# Supplementary material for: Genome-wide identification of the Capsicum bHLH transcription factor family: discovery of a candidate regulator involved in the regulation of species-specific bioactive metabolites
Source: PubMed Central journal article supplement (PMC8183072; doi:10.1186/s12870-021-03004-7), 2021-06-07
Supplement: 12870_2021_3004_MOESM1_ESM.pdf [file 12870_2021_3004_MOESM1_ESM.pdf]

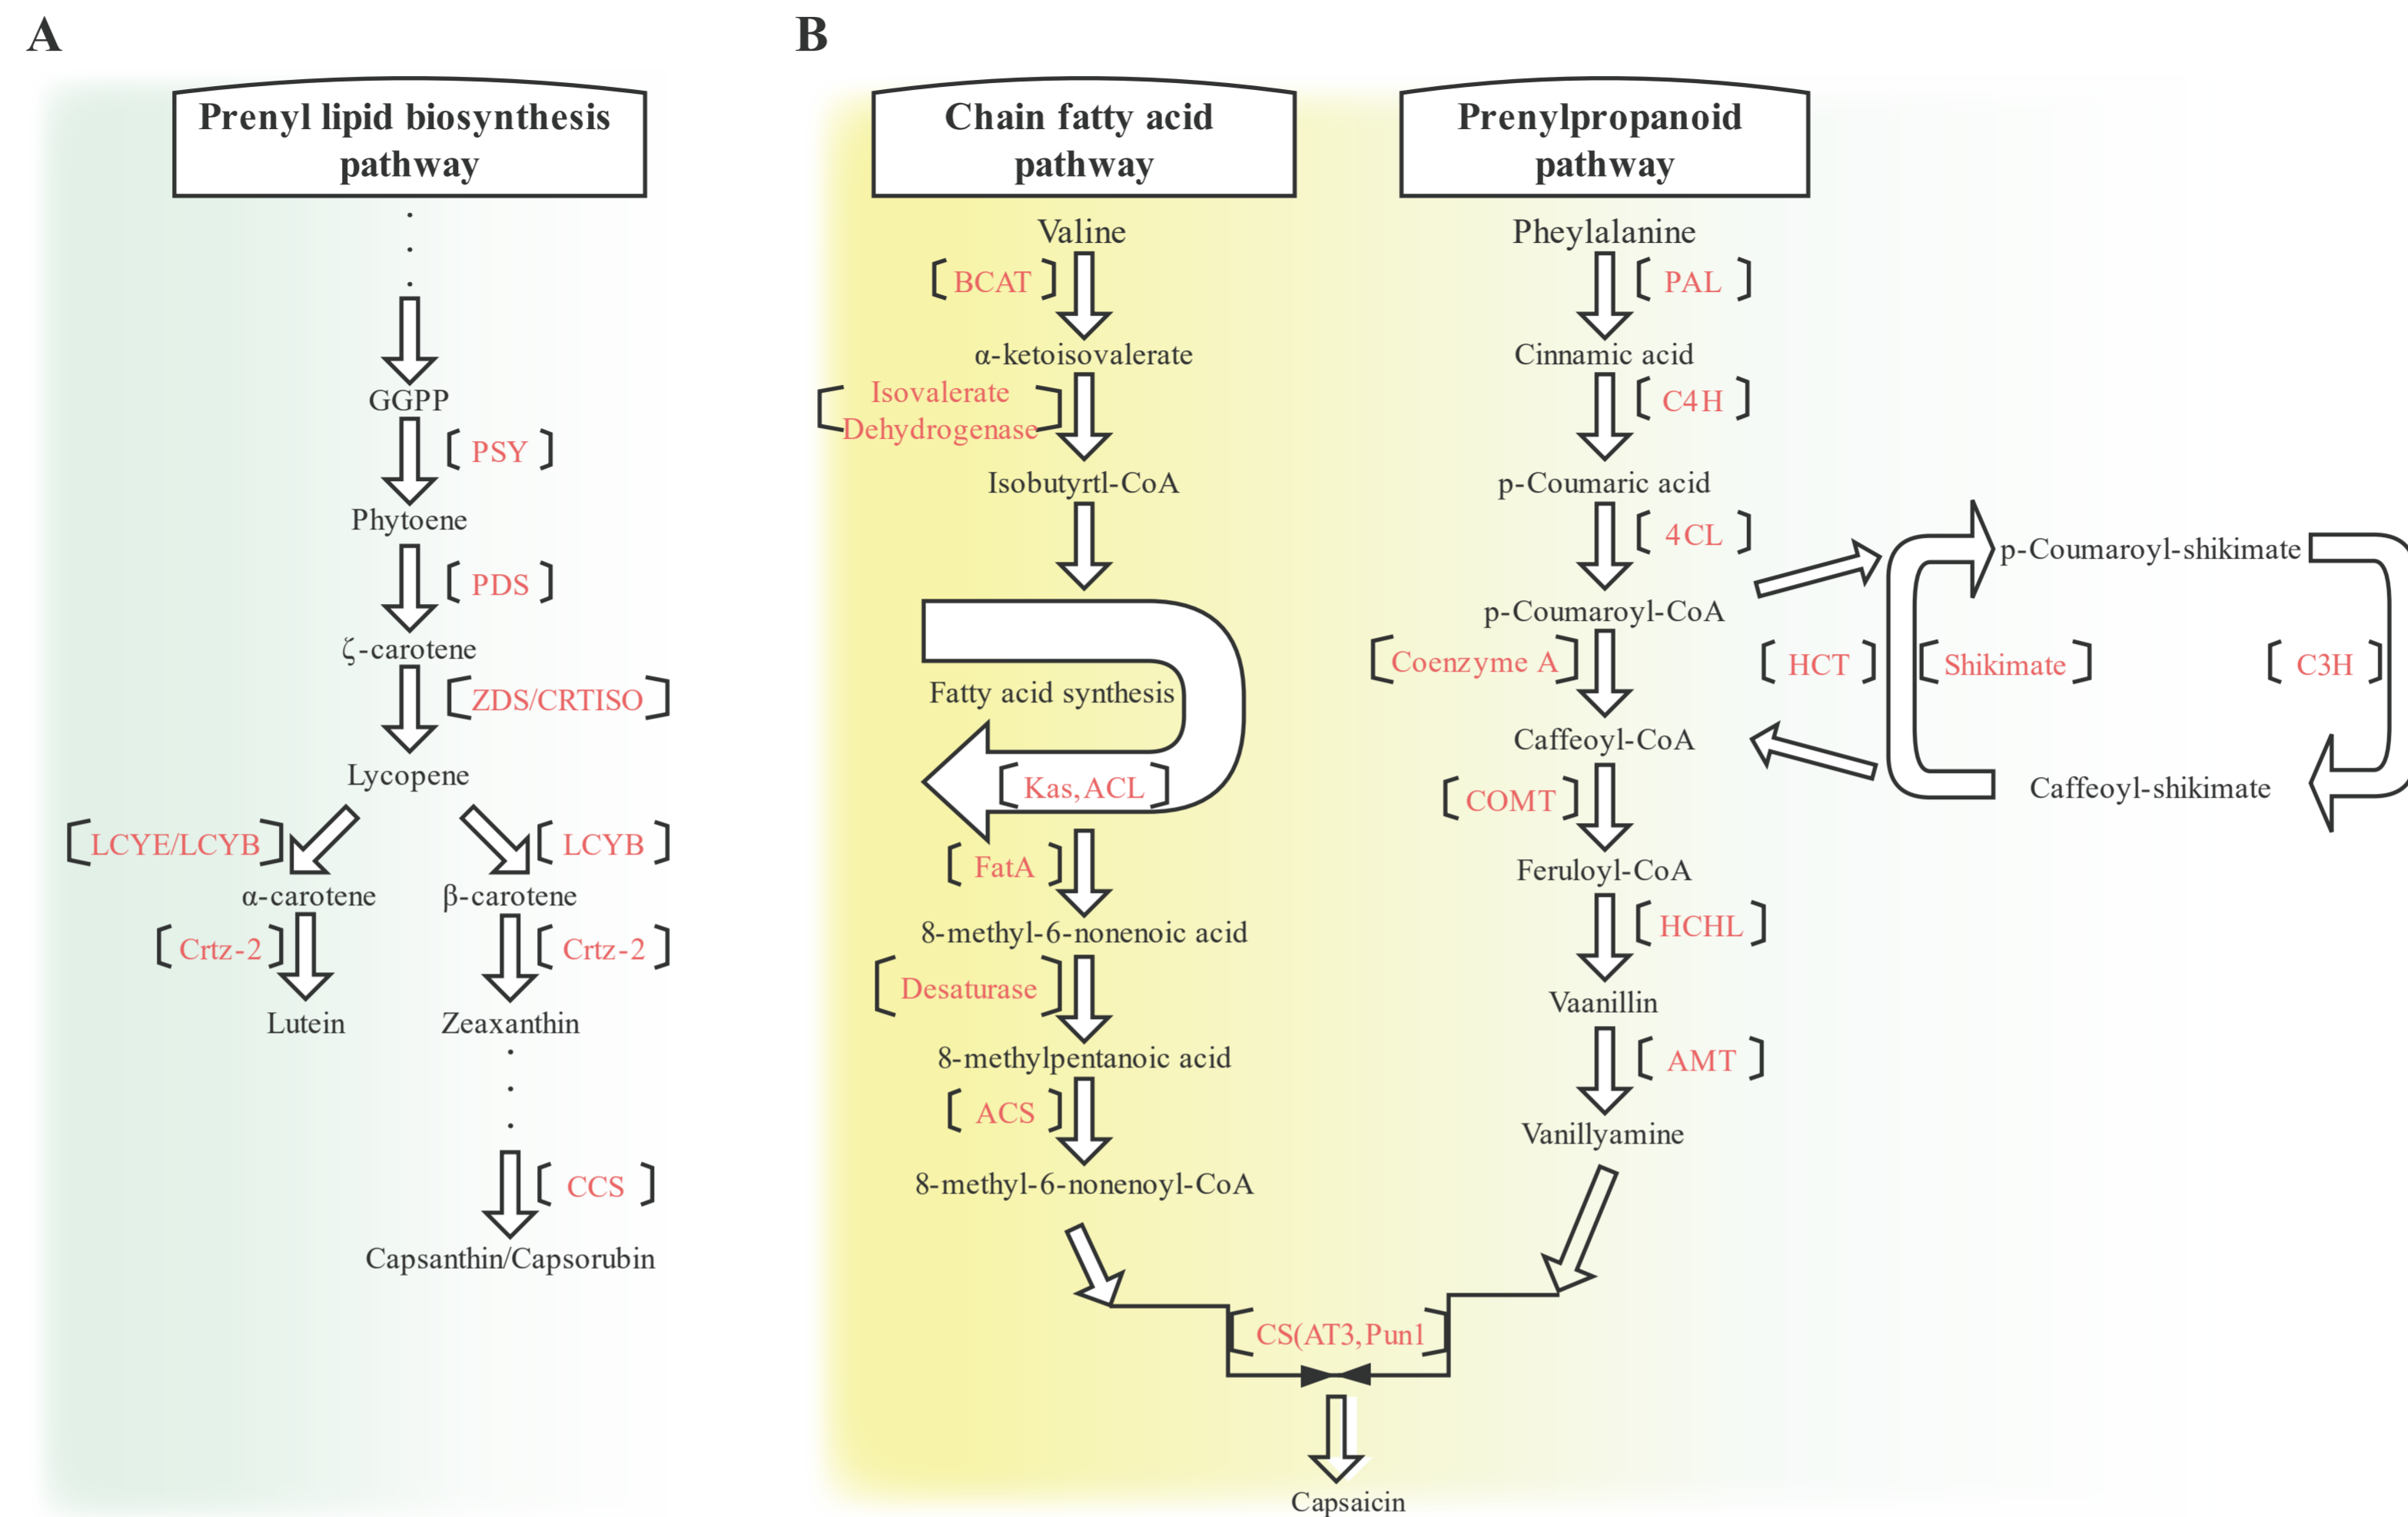

**Figure S1.** Carotenoid (A) and capsaicinoid (B) biosynthetic pathways. A. In the first step, Geranylgeranyl pyrophosphate (GGPP) is catalyzed by a series of synthetases, and transformed to lycopene. Then, there are two different branches:  $\alpha$ -carotene finally is developed into lutein, and  $\beta$ -carotene is catalyzed to transform into capsorubin or capsanthin by capsanthin/capsorubin synthase (CCS). The ellipsis indicates intermediate steps. B. Phenylalanine and chain fatty acid biosynthesis pathways which are adjusted by a series of genes encoding enzymes synthesize capsaicin together.

ZDS,  $\zeta$ -carotene desaturase; CRTISO, carotenoids isomerase; LCYE, lycopene  $\epsilon$ -cyclase; CrtZ-2,  $\beta$ -carotene hydroxylase-2; PAL, phenylalanine ammonia-lyase; C4H, cinnamate 4-hydroxylase; 4CL, 4-coumaroyl-CoA ligase; HCT, hydroxycinnamoyl transferase; C3H, p-coumaroyl shikimate/quinate 3-hydroxylase; COMT, caffeoyl-CoA 3-O-methyltransferase; HCHL, hydroxycinnamoyl-CoA hydratase lyase; AMT, aminotransferase; BCAT, branched-chain amino acid aminotransferase; Kas, ketoacyl-ACP synthase; ACL, acyl carrier protein; and FatA, acyl-ACP thioesterase.



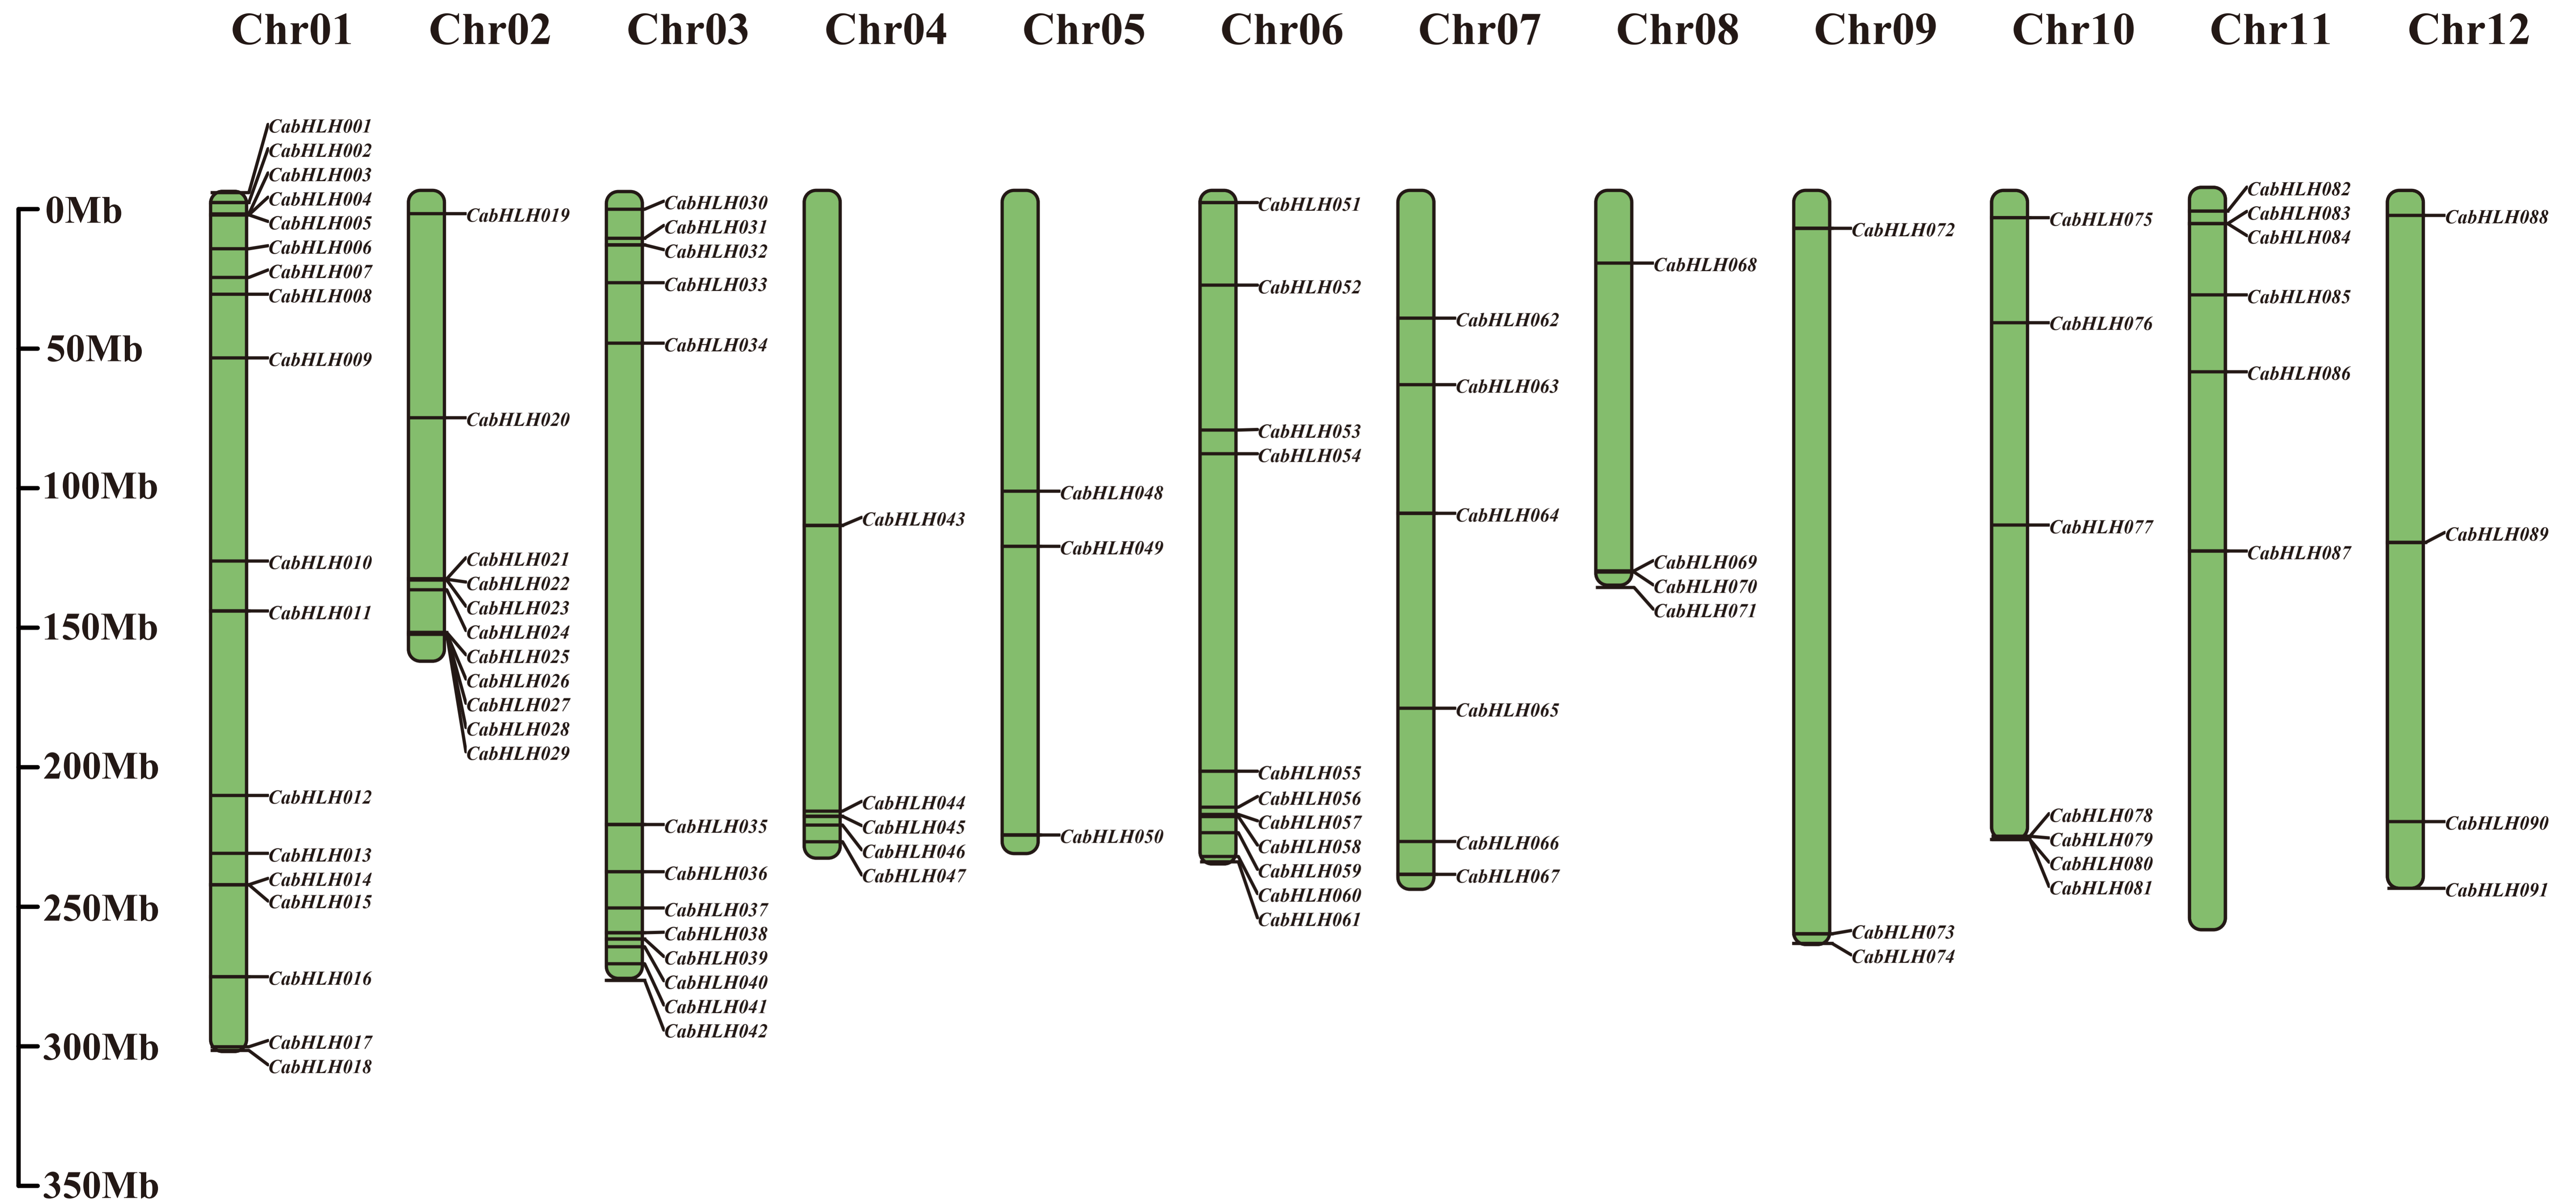

**Figure S2.** Chromosomal localizations of *CabHLHs*. The chromosome distribution of each *CabHLH* was obtained from the 2.0 version *Capsicum annuum* genome annotation information, and TBtools (1.068 version) were used to make the linkage visualization.



|           | basic                            | helix 1 | loop                   | helix 2             |              |
|-----------|----------------------------------|---------|------------------------|---------------------|--------------|
| CabHLH001 | I AKNHVEAERLRREKLNHRFYALRS       | ..      | VVPNVK                 | MDKASLLADAVTY       | I NELKAKVEE  |
| CabHLH061 | EALNHVEAERORREKLNQRFYALRA        | ..      | VVPNI K                | MDKASLLGDAL AY      | I TDLQARI RV |
| CabHLH097 | ATDSHSLAERVRRREKISERMRFALQD      | ..      | LVPGCKI                | TGKAGMLDEI I NY     | VQSLOROVF    |
| CabHLH006 | EPLNHVEAERORREKLNQRFYALRA        | ..      | VVPNVK                 | MDKASLLGDAL SY      | I NELKSKLHN  |
| CabHLH082 | .. KSHSEAERRRRERI NNHLAKLRS      | ..      | LLPNTK                 | TDKASLLAEVI QH      | VKELKRQTS L  |
| CabHLH066 | .. KNHSEAERRRRERI NGHLGTLRN      | ..      | LI PGTK                | MDKAALLAKVI GH      | I KELRMNAE   |
| CabHLH034 | .. RSHSEAERRRRDRINAQLS TLRK      | ..      | LI PTKS                | MDKAALLGS VI DH     | VKDLKGRSTE   |
| CabHLH037 | ATDSHSLAERVRRREKISERMKMLQS       | ..      | LVPGCKV                | TGKALMLDEI I NY     | VQSLOROVF    |
| CabHLH023 | .. KSHSEAERRRRQRI NAHLS TLRN     | ..      | LVPSSK                 | MDKAALLAQVVCQ       | VKQLKETATH   |
| CabHLH004 | .. SKNI VSERNRRRKLNERLFAIRA      | ..      | VVPNI K                | DKAS I KDAI DH      | I QDLHEQERR  |
| CabHLH005 | .. SKNI VSERNRRRKLNERLFAIRA      | ..      | VVPNI K                | DKAS I KDAI DH      | I QDLHEQERR  |
| CabHLH017 | KMDI HVEAERKRREKLNHRFYALRS       | ..      | VVPYVK                 | MDKASLLADAVTY       | I NELKANI ED |
| CabHLH102 | .. I NHKEAERRRRORI NS HLHTLRT    | ..      | LLSCNK                 | TDKASLLAKVVQR       | VRELKEQTS K  |
| CabHLH092 | GHELHI RTERERRRKRMNMFEELOT       | ..      | LLP.. HQ               | DKSSI VDETVR        | .. LS TVN    |
| CabHLH078 | .. LNHNAS ERDRRKKI NGLYS S LRS   | ..      | LLPASHK                | LSI PATVS KI LKY    | I PELQNEVER  |
| CabHLH079 | .. LNHNAS ERDRRKKI NDLYF S LRS   | ..      | LLPASHK                | LSI PSTI SRI LKY    | I PELQSEVER  |
| CabHLH052 | .. I LHRDI ERHRRHEMATLCATLRS     | ..      | NLSYETK                | RSLS DHVQAVNY       | I KLENNI KE  |
| CabHLH035 | .. I I HRDI ERORRQENS ALYS S LRS | ..      | LLPLQI K               | RSVS DHVHEAVNY      | I KEMQANI KE |
| CabHLH011 | ATNSHSLAERVRRREKISERMKFLQD       | ..      | LVPGCKV                | TGKAVMLDEI I NY     | VQSLOROVF    |
| CabHLH043 | NPLQPNLFENASVOPSPDAEHCTS Q       | ..      | LYGPGK                 | .. QDTI ES DVLS Y   | GRNLQEQMKI   |
| CabHLH054 | KKVMHRETERORRQENS TLYACLQ        | ..      | QLPLEI R               | .. STS DHI LVAANY   | I EQLOKQVH   |
| CabHLH008 | KMSAQSI AARORRKKI TEKTQELGK      | ..      | LI PGGK                | MNTAEMLQATFEY       | I KFLQAQAGL  |
| CabHLH059 | ATDSHSLAERVRRREKISERMKI LQA      | ..      | LVPGCKV                | TGKALMLDEI I NY     | VRS LONQVEF  |
| CabHLH015 | .. DMKHHAS EKLRRRI HFS DKFQALRT  | ..      | LI PNPKN               | DRATI I VDAI GY     | I NELKKEMMR  |
| CabHLH027 | S DQHHI I AERKRREKLS QRFVLSA     | ..      | I LPDLK                | VDKASI LEQAI NH     | VKELQEKVQ    |
| CabHLH016 | .. DSI AI QS GRAEACELMQLDMS E    | ..      | AI RLGS                | PDGSDNMS DLNLV      | GAGLNTTES F  |
| CabHLH046 | ATNSHSLAERVRRERI SERMRLQE        | ..      | LVPGCKI                | TGKAVMLDEI I NY     | VQSLQOOVEF   |
| CabHLH022 | S KDPQSVAARHRRERI SERI RI LQR    | ..      | LVPGCK                 | MDTASMLDEAVHY       | VKFLKKQLQS   |
| CabHLH009 | ATHPRS I AERMRRTRI SERMKQLQD     | ..      | LFPNMK                 | TNTADMLDLAVDY       | I KDLQKQVOT  |
| CabHLH072 | ATDAHSLAERVRRREKISERMKLLQD       | ..      | LVPGCKV                | TGKAVMLDEI I NY     | VQSLOROVF    |
| CabHLH051 | AAEVHNS ERKRRDRI NEKMRVLQE       | ..      | LI PRCK                | ADKVS MLDEAI EY     | LKSLQLQVQM   |
| CabHLH044 | SAYTHAVAERKRREERI NGHLHTLKK      | ..      | LFPYLK                 | KDKPRVLTEAVTQ       | LKEI AQQLEL  |
| CabHLH010 | LSQEH I LAERKRREFS HLFVAVLAK     | ..      | TI PGLK                | LDKAS I LEDAI KY    | I GELQERVST  |
| CabHLH024 | KTADRKTI EKNRRS QMKDLYMKLNS      | ..      | LVHHDHF                | SSLPDQLEEAANY       | I KKLQI DLEK |
| CabHLH075 | DNSKELI HGPS YNNDVNS NLHLVDD     | ..      | I VESHEF               | FRATTI CDNS KEL     | VHGLHLVDDI   |
| CabHLH013 | TPSDSI QKERKRRGKMAEVYSLQS        | ..      | LVPSI HA               | TREKI VTESTDY       | I KRLEEEI LR |
| CabHLH105 | GHELHI RTERERRRKRMNMFEELOT       | ..      | LLP.. HQ               | DKSSI VDETVRY       | I KMLENTVDN  |
| CabHLH094 | GHELHI RTERERRRKRMNMFEELOT       | ..      | LLP.. HQ               | DKSSI VDETVRY       | I KMLENTVDN  |
| CabHLH104 | GHELHI RTERERRRKRMNMFEELOT       | ..      | LLP.. HQ               | DKSSI VDETVRY       | I KMLENTVDN  |
| CabHLH101 | GYEI HI WTERERRRKRMNMFENLOT      | ..      | LLP.. HQ               | DKSSI VDEAVRY       | I KILQTTVTN  |
| CabHLH014 | .. TKHFATERORRVHLNDKYKALRS       | ..      | VVPNPKT                | DRASI VKDAI DY      | I NELKRGVNE  |
| CabHLH033 | .. VVHRNVERHRRKEMANLVNS LRS      | ..      | LI PI EI K             | RSAS DHVQAVNY       | I KHLQKNI QE |
| CabHLH002 | PDKNRV I SERRRREK I NERFMHLS     | ..      | MLPTS K                | VDKVSLLEDEI AY      | MKELERRVOD   |
| CabHLH021 | AAEVHNS EKRRRS RI NEKMKALQK      | ..      | LI PNS K               | TDKAS MLDEAI EY     | LKQLQLOVQM   |
| CabHLH036 | NRI SHI TVERNRRKQVNEHLS VLRS     | ..      | LMP CFA                | .. DQASI I GGVVDY   | I NELQOVLQS  |
| CabHLH050 | QRMTHI AVERNRRKQVNEHLRV LRS      | ..      | LMPGS V                | .. DQASI I GGAI EF  | VRELEQLLOC   |
| CabHLH030 | QRMHI AVERNRRKQVNAHLV LRS        | ..      | LMPSS V                | .. DQASI VGGAI EF   | VRELEQLLOC   |
| CabHLH012 | .. MS HI AVERNRRKQVNEHLKI LRS    | ..      | LTPCFI                 | .. DQASI I AGVI EF  | I KELHLVLOS  |
| CabHLH071 | QRI THI AVERNRRKQVNEYLS VLRT     | ..      | LMPGS V                | .. DQASI VSAAI NY   | VKELEQLOF    |
| CabHLH088 | QRMTHI AVERNRRKQVNDYLAI LRS      | ..      | LMPPSA                 | .. DQASI VGGAI NF   | VKELEQLOF    |
| CabHLH068 | PQSKNLMAERKRRKLNRLYALRA          | ..      | LVPKI K                | DRASI LGDAI EY      | VMELEKQVKD   |
| CabHLH077 | ATDPQSLYARKRREERI NERLKI LQS     | ..      | LVPNGK                 | VDI STMLEEAVQY      | VKFLQLQI KL  |
| CabHLH007 | YQSKNLVTERKRRNRI KDGLFALRA       | ..      | LVPNI K                | DKVAI LGDAI DY      | I NLOEKVKL   |
| CabHLH086 | YQSKNLVTERKRRNRI KDGLFALRA       | ..      | LVPNI K                | DKVAI LGDAI DY      | I NLOEKVKL   |
| CabHLH106 | ATDPQSLYARKRREERI NERLRLTQS      | ..      | LVPNGK                 | VDI STMLEEAVQY      | VKFLQLQI KL  |
| CabHLH053 | DRSRTL I SERKRRGRMKEKLYALRS      | ..      | LVPNI K                | DKAS I GDAL LY      | VOGLQTKAKI   |
| CabHLH090 | SSDPQSVAARHRRERI SEKI RI LQR     | ..      | LVPGCK                 | MDTASMLDEAI HY      | MKFLKKQVQS   |
| CabHLH098 | STDPQSVAARHRRERI SERI RI LQR     | ..      | LVPGCK                 | MDTASMLDEAI HY      | VKFLKNQVQS   |
| CabHLH003 | MASKNI MSERNRRKLNRLFAIRA         | ..      | VVPNI K                | DKAS I KDAI EY      | I QDLHEQERR  |
| CabHLH064 | MASKNI VSERNRRKLNRLFAIRA         | ..      | VVPNI K                | DKAS I KDAI DY      | I QDLHEQERR  |
| CabHLH085 | ATDSHSLAERARREKISERMKVLQD        | ..      | LVPGCKV                | I GKALVLDDEI I NY   | I QSLQHQVEF  |
| CabHLH041 | LPAKNLMAERRRRKLNDRLYMLRS         | ..      | VVPKI K                | DRASI LGDAI EY      | LRELLQTI ND  |
| CabHLH080 | ATDSHSLAERARREKINARMKLLQE        | ..      | LVPGCKI                | SGTAVVLDDEI I NH    | VQSLOROVF    |
| CabHLH026 | QPSKNLMAERRRRKLNDRLS MLRS        | ..      | VVPKI K                | DRTS I LGDTI DY     | VKELLDKI SK  |
| CabHLH045 | QPSKNLMAERRRRKLNDRLS MLRS        | ..      | VVPKI K                | DRTS I LGDTI DY     | MKELLEKI NK  |
| CabHLH076 | .. LNHVEAERORREKLNHRFYALRS       | ..      | VVPHVK                 | MDKASLLS DAVAY      | I NELSKVDE   |
| CabHLH070 | MAMNHVEAERORREKLNRFYALRS         | ..      | VVPNVR                 | MDKASLLS DAVSY      | I NQLKARVDE  |
| CabHLH087 | LGKRTS EAARLHPPLYEHPLOVLS Q      | ..      | SEAEDE                 | GEEFYKREDPNNGI      | I PSTKELVKT  |
| CabHLH084 | EVI QYVQYLOETVQKYEYS YOPMS S     | ..      | LMPWRS                 | .. VQSLP VOPHALKNGI | GPLVTS TMQ   |
| CabHLH018 | EPLNHVEAERORREKLNQRFYALRA        | ..      | VVPNVK                 | MDKASLLGDAL AY      | I NELKSVQON  |
| CabHLH107 | .. QDHI I AERKRREKLS QRFI ALSA   | ..      | LI PGLK                | MDKAS VLGDAI KY     | LKQLQERVKT   |
| CabHLH038 | ATDSHSLAERARREKISERMKI LQD       | ..      | LVPGCKV                | I GKALVLDDEI I NY   | I QSLOROVF   |
| CabHLH049 | EVI QYVQYLODKVQKYEYS YOPMS S     | ..      | LMPWRS                 | .. VQSLP VOPHALKNGI | GPLVTS TMQ   |
| CabHLH073 | TQVHHMI SERRRREKLNENFOHLRS       | ..      | LLPLGK                 | KDKAS VLAS TTDY     | I SCLKDQVKE  |
| CabHLH091 | ATHPRS I AERVRRTRI SERMKQLQE     | ..      | LVPNMK                 | TNTADMLDFEADY       | I KELETQVKA  |
| CabHLH028 | .. QDHVLAERKRRERLTQYFVTLST       | ..      | LI PNLK                | LDKATVLDGAI KY      | I KOLEEQVKS  |
| CabHLH029 | .. QDHVLAERKRRERLTQYFVTLST       | ..      | LI PDLK                | LDKAS I LGDAI KY    | I KOLEEQVKS  |
| CabHLH103 | ATHPRS I AERERRTRI S GKLKLLQD    | ..      | LVPNMK                 | TSYADMLDLAVQH       | I RTLQDQVQV  |
| CabHLH062 | ATNSHSLAERI RREKISERMKYLQD       | ..      | LVPGCKV                | TGKAVMLDEI I NY     | VQSLOROVF    |
| CabHLH048 | EPLNHVEAERORREKLNQRFYALRA        | ..      | VVPNI K                | MDKASLLGDAL AH      | I TDMQKRI RD |
| CabHLH058 | RAAI HNQAERRRRDRINAQKMLQK        | ..      | LVPNAK                 | TDKASMLDEVI RY      | LKQLQAQVQL   |
| CabHLH081 | ATHPRS I AERVRRTRI SERMKQLQE     | ..      | LVPNMK                 | TNTADMLDLAVEY       | I KGLQKQYKV  |
| CabHLH040 | AAAVHNQSERRRRDRINAQKMLQK         | ..      | LVPNAK                 | TDKASMLDEVI DY      | LKQLQAQVQF   |
| CabHLH032 | ATDPHSI AERLRREKISERI KALQE      | ..      | LVPSCK                 | .. DRAAMLDEI LDY    | VKFLRLQVQV   |
| CabHLH060 | ATDSHSLAERVRRREKISERMKLLQD       | ..      | LVPGCKV                | TGKALMLDEI I NY     | VQSLOROVF    |
| CabHLH042 | STDPQTVAAARORREERI SERI RVLOR    | ..      | LVPGCK                 | MDTASMLDEAANY       | LKFLRSQVKA   |
| CabHLH063 | AAEVHNS ERKRRDRI NEKMKALQD       | ..      | LLPHSK                 | TDKASMLDEAI EY      | LKSLQMLQOM   |
| CabHLH099 | AAEVHNS ERKRRDRI NEKMRALQE       | ..      | LI PNCK                | ADKASMLDEAI EY      | LKTLQLQVQI   |
| CabHLH025 | TKDPQSI AAKNRRERI SERLKI LQE     | ..      | LVPNGK                 | VDLVTMLEKAI GY      | VKFLQLQVQV   |
| CabHLH100 | SAEVHNS EKRRRS RI NEKMLKALQD     | ..      | LI PNS K               | TDKASMLDEAI EY      | LKQLQLQVQM   |
| CabHLH039 | EVI EYI HFLOGKVHKEYES YQGVNDNEP  | ..      | LKPHRT                 | THGVS NHPQCTI N     | .. LEPNIST   |
| CabHLH057 | EVI EYI QFLOEKVHKEYES YQGLNEKP   | ..      | STPNSM                 | AGLI DHS OGTNS      | .. LEPKRTS   |
| CabHLH069 | EPLNHVEAERORREKLNQRFYALRA        | ..      | VVPNI K                | MDKASLLGDAL AY      | I TELQKRLRD  |
| CabHLH067 | DAVRMVTQLRDEAQKLDKSNLNLQE        | ..      | KI KELALAVEKTELREDEKOR | ..                  | LKALEQQLKT   |
| CabHLH031 | DAI RVLNQLKTES EYKEMNQLVE        | ..      | EI KMLA                | .. EKNELRREKLA      | LKAMEQELKA   |
| CabHLH095 | DAVRVVTQLRGEAQKLDKSNLNLQE        | ..      | KI KELALSVEKHELREDEKOR | ..                  | LKSLQOQLKT   |
| CabHLH096 | DTVQMLKDLTAQVSR LKS EYAAALTD     | ..      | ESRELO                 | .. EKNDLREKTS       | LKSLNAQYQO   |
| CabHLH074 | ATDPHSI AERLRREKISERMKYLQD       | ..      | LVPNAKT                | .. DKASMLDEI I DY   | VRFLQLOVQV   |
| CabHLH083 | EVI QYVQYLOETVQKYEYS YOPMS S     | ..      | LMPWRS                 | .. VQSLP VOPHALKNGI | GPLVTS TMQ   |
| CabHLH056 | LPAKNLMAERRRRKLNDRLYMLRS         | ..      | VVPRI K                | DRASI LGDAI EY      | LKELLOKI ND  |
| CabHLH093 | TQVHHMI SERRRREKLNENFOHLRS       | ..      | LLPLGK                 | KDKAS VLAS TTDY     | I SCLKDQVKE  |
| CabHLH055 | ATHPRS I AERVRRTRI S DRI RKLQE   | ..      | LVPNMK                 | TNTADMLDEAVEY       | VKFLQROI OE  |
| CabHLH089 | ERLNHAEVERORRAKLNQQFNALRA        | ..      | VVPNI K                | KDKVSLGGAI AH       | I TDMQKRI RD |
| CabHLH047 | DRSRTL I SERKRRGRMKEKLYALRS      | ..      | LVPNI K                | DKAS I GDAL LY      | VOGLQTKAEI   |
| CabHLH065 | TQVHHMI SERRRREKLNDS FOLLRS      | ..      | LLPPAK                 | KDKAS VLAS TTEY     | LSSLKQVQVEE  |
| CabHLH019 | ATDSHSLAERARREKISERMKYLQD        | ..      | LVPGCKV                | TGKAGMLDEI I NY     | VQSLQKQVEF   |
| CabHLH020 | QPSKNLMAERRRRKLNDRLS MLRS        | ..      | I VPKI K               | DRTS I LGDAI DY     | MKELLEKI HT  |

**Figure S3.** Multiple alignment analysis of the bHLH domain in pepper bHLH proteins. Multiple alignments were performed by Clustal X 2.1 with the default parameters. Amino acids with greater than 75% are shown in pink, those with 50 to 75% identity are shown in cyan, and those with 33 to 50% identity are shown in yellow. Dotted lines indicate gaps.



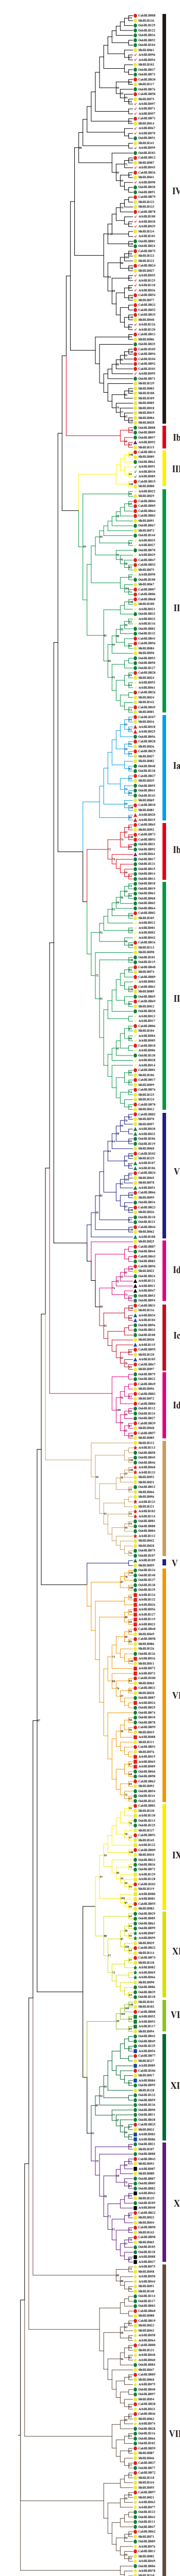

**Figure S4.** Phylogenetic tree of the bHLH family in *Capsicum annuum*, *Arabidopsis thaliana*, tomato, and rice. The different-coloured branches indicated different groups of bHLH proteins. Red, yellow and green circles represented bHLH proteins in *Capsicum annuum*, tomato and rice, respectively. Other different colours and shapes indicated different groups in phylogeny of *Arabidopsis thaliana*.

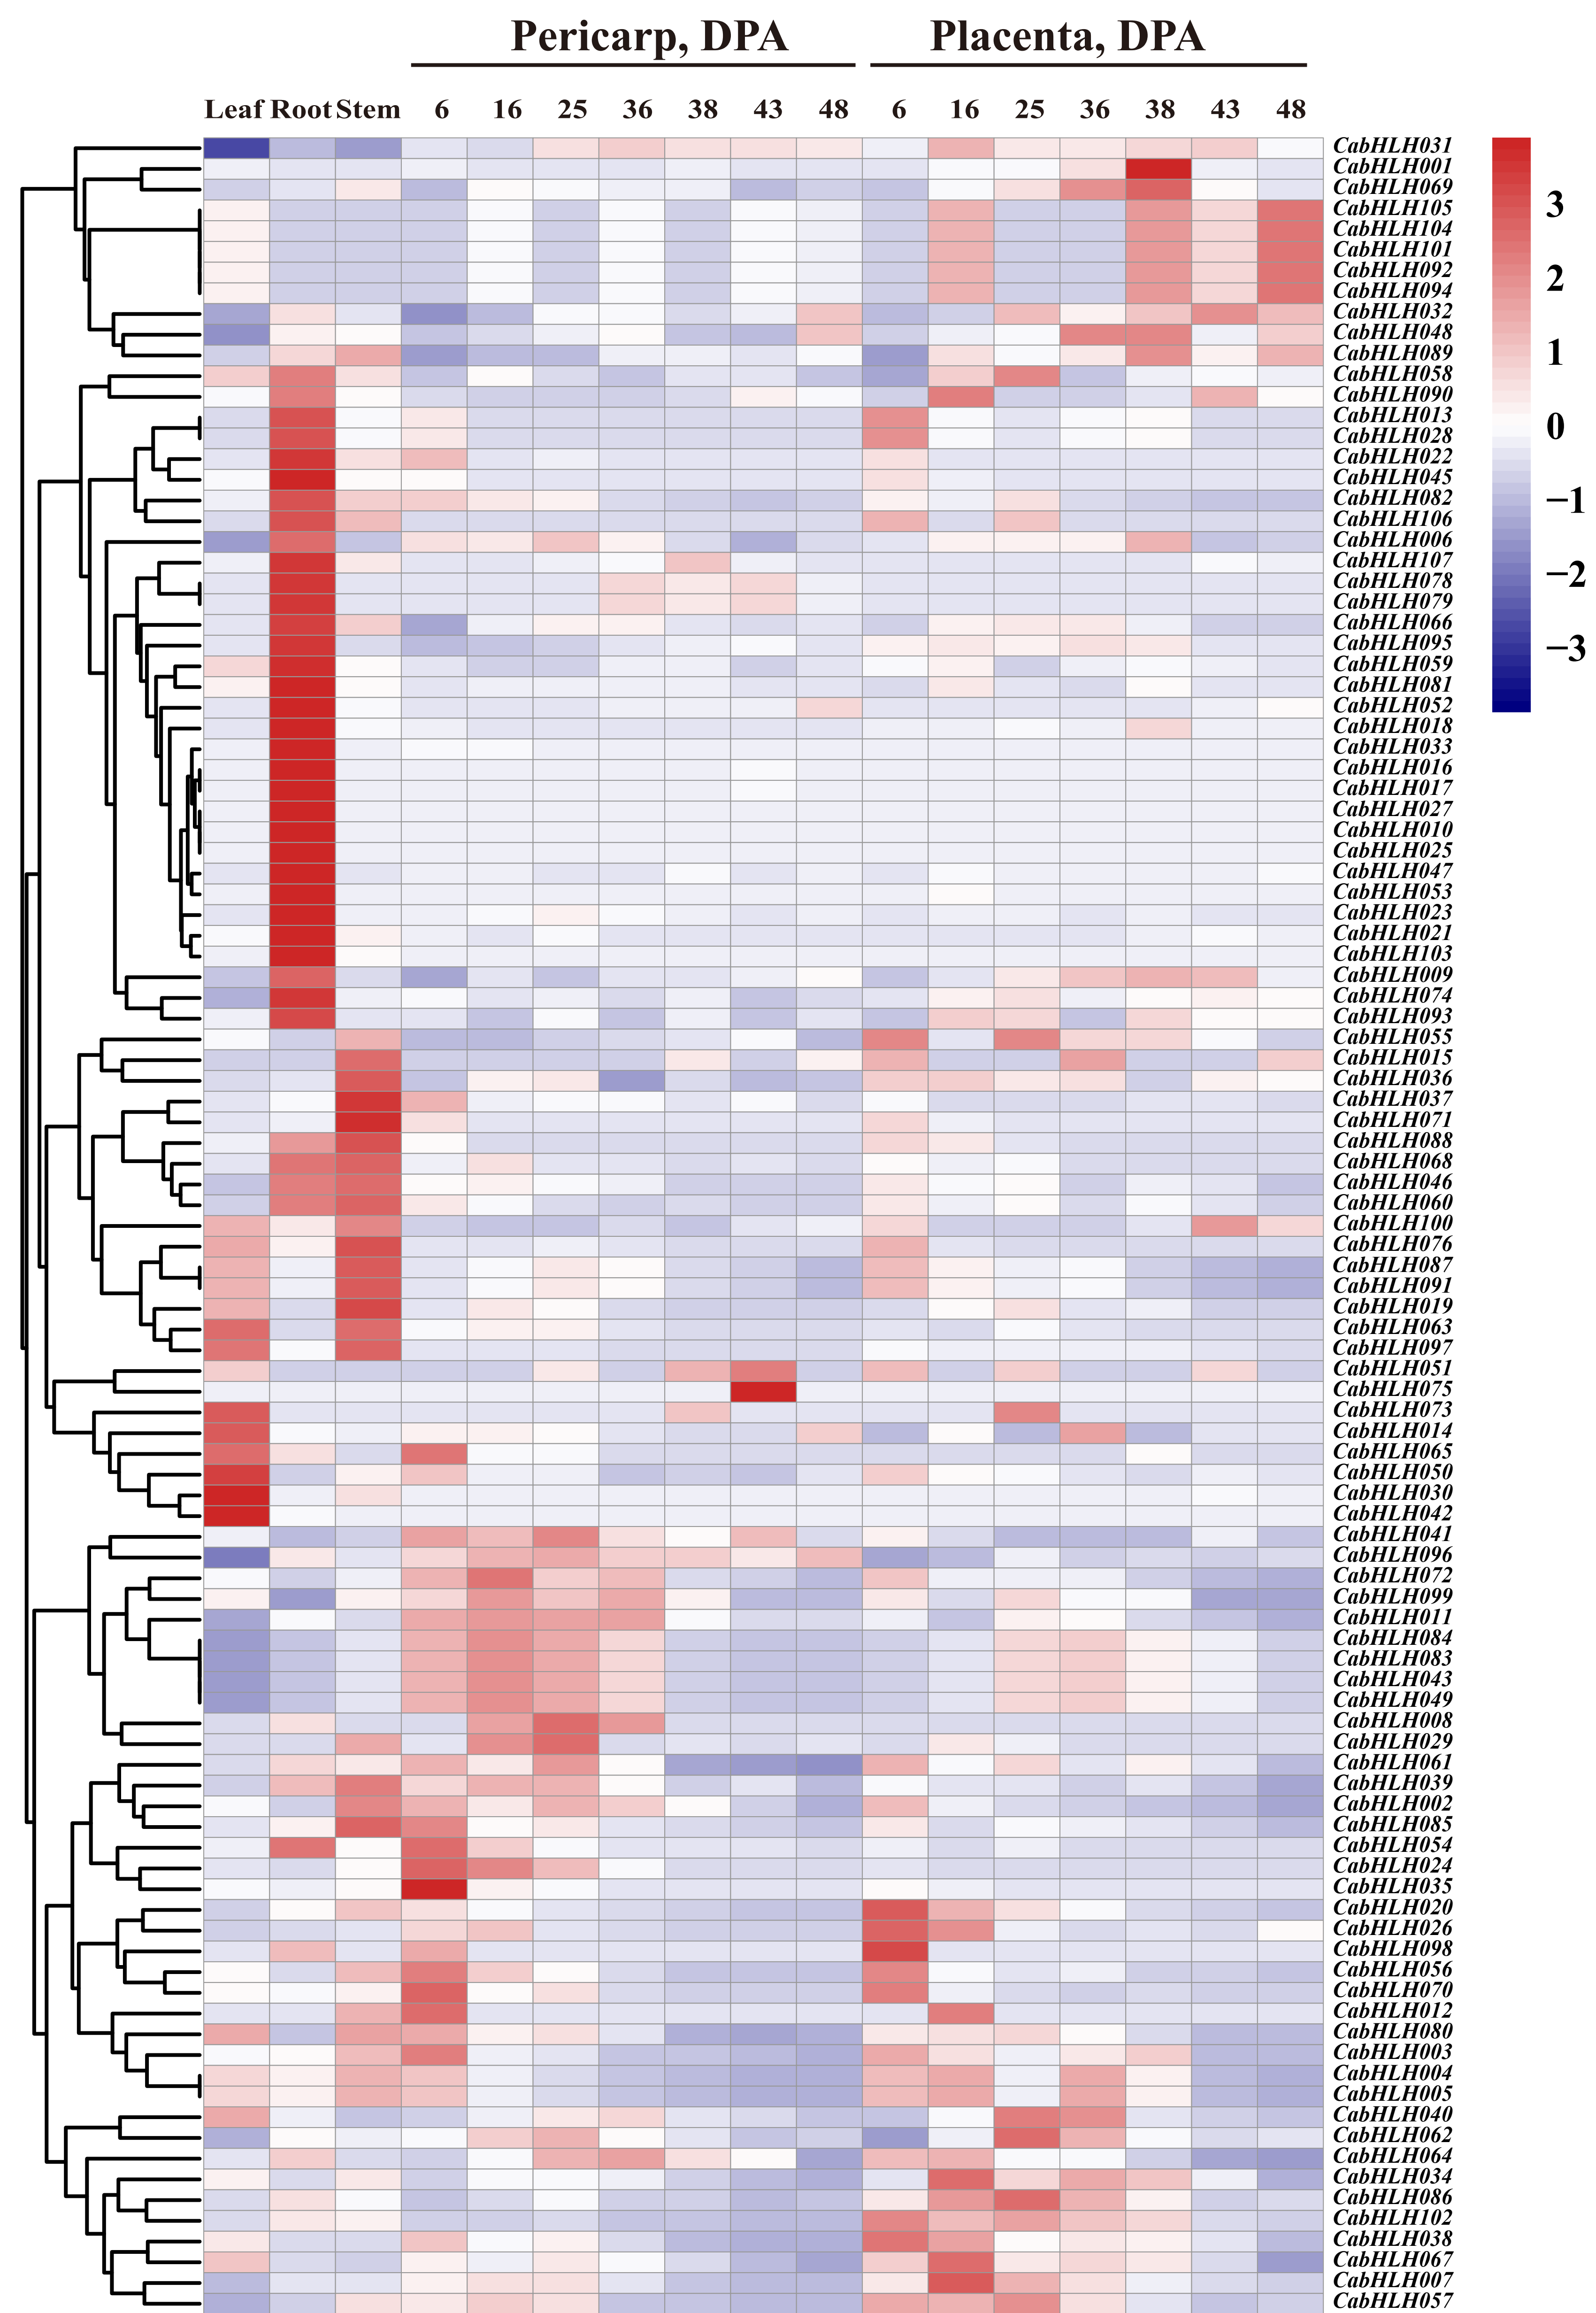

**Figure S5.** The expression patterns of *CabHLH* genes in different tissues. The RPKM values which was mapped to the *Capsicum annuum* genome of 1.5 version were performed by Kim et al (2014) and used to construct the heat map.



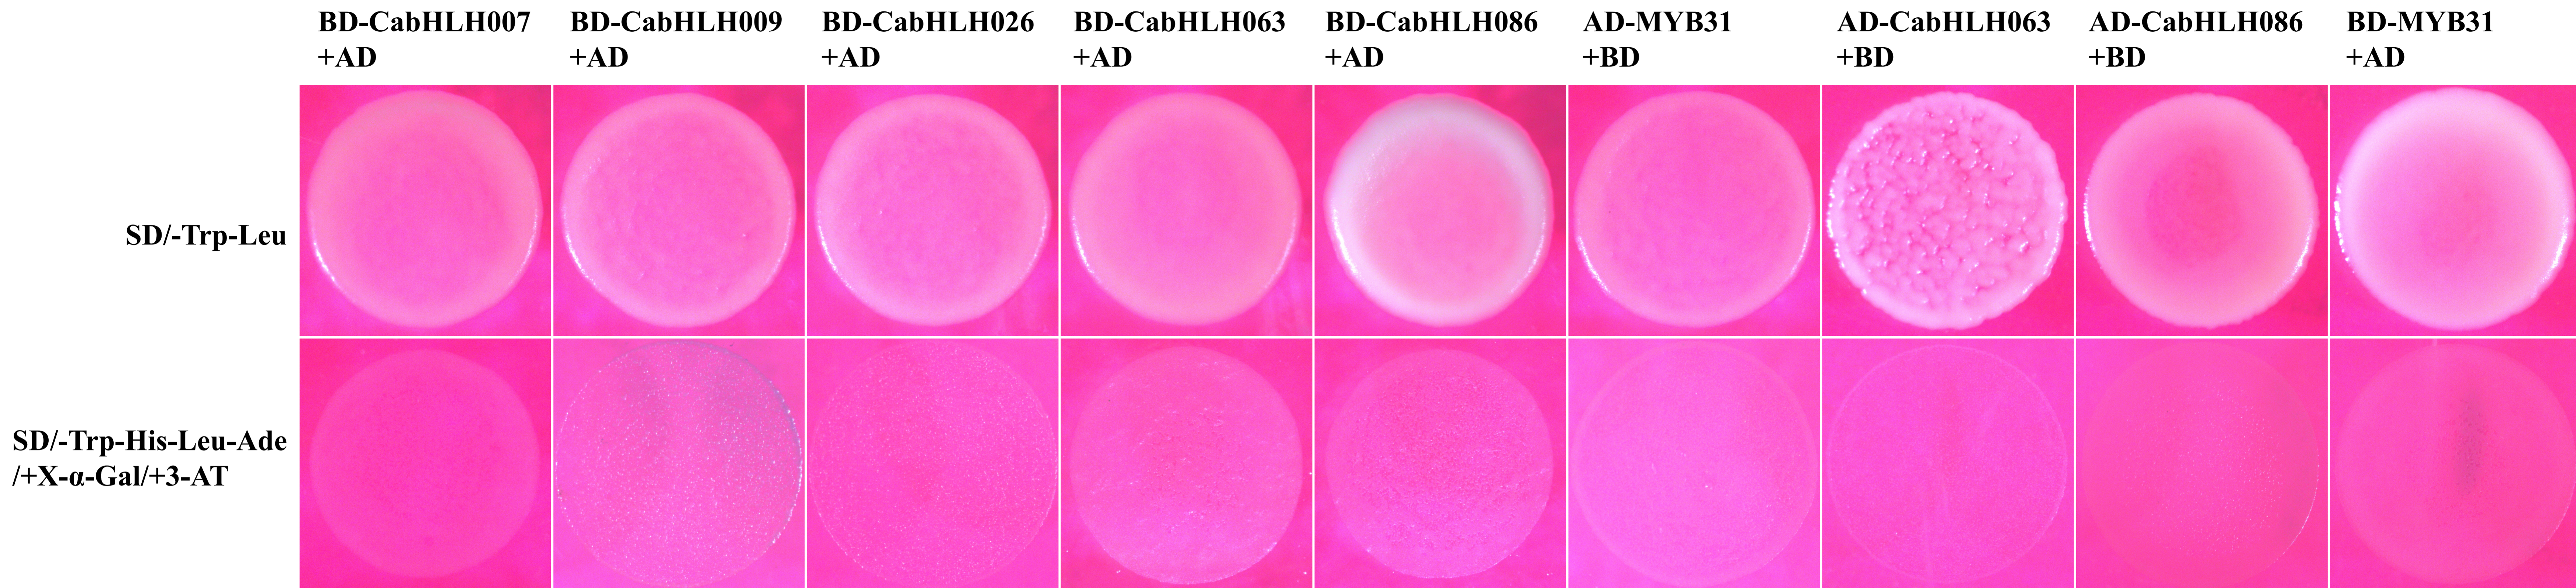

**Figure S6.** Diagram of yeast two-hybrid assays experiment. AD and BD represent empty pGADT7 and pGBKT7 vectors, separately. Among them, the self-activation function of CabHLH009 and CabHLH026 were inhibited under 15mMol and 30mMol 3-AT, separately. The rest lacked the self-activation function.
